# Supplementary material for: Regulation of metabolite production during the encounter between the actinobacterium Frankia and its host Alnus glutinosa
Source: Research Square preprint supplement (doi:10.21203/rs.3.rs-8733022/v1), 2026-02-12

**Supplementary Material 1**

**Fahraeus 0 medium:**

MgSO4, 7H2O 0,12 g

KH2PO4 0,10 g

Na2HPO4,12H2O 0,12 g

Fe-citrate (1g/100 ml) 0,5 ml

Microelements 200 µl

Distilled water 1000 ml

*pH adjusted to 6,5*

CaCl2,2H2O 660 µl

Microelements:

MnCl2,4H2O 0,031 g

CuSO4,5H2O 0,031 g

ZnCl2  0,020 g

H3BO3 0,020 g

Na2MoO4,2H2O 0,023 g

Distilled water 20 ml

**Supplementary Material 2**

***Frankia* culture medium: FBM-(without NH4Cl)**

|  | ***1 liter FBM*** |
| --- | --- |
| KH2PO4 | 0.95 g |
| K2HPO4 | 0.6 g |
| Sodium propionate | 0.48 g |
| MgSO4, 7H2O | 0.025 g |
| CaCl2, 2H2O | 0.010 g |
| Oligo-elements  10 X | 0.10 ml  (100 µl) |
| Fe (III)Cl 45% | 5 µl |

**Oligo elements (10X)** : H3BO3 (2.86g), ZnSO4,5H2O (0.22g), CuSO4, 5H2O (0.08g), Na2MoO4, 2H2O (0.025g), CoSO4, 7H2O (0.001g) and H2O (100 mL)

**Supplementary Material 3**

Mobile phase gradient used during amino acid analysis by HPLC-DAD-FLD in 26 min; solvent A: sodium dihydrogen phosphate; solvent B: mixture of water, acetonitrile and methanol.

| Time (min) | Solvent A  (Na2HPO4, 40mM pH = 7.8) | Solvent B (CH3CN: MeOH: H2O, 45: 45: 10) |
| --- | --- | --- |
| 0 | 100 | 0 |
| 1.9 | 100 | 0 |
| 18.1 | 43 | 57 |
| 18.6 | 0 | 100 |
| 22.3 | 0 | 100 |
| 23.2 | 100 | 0 |
| 26 | 100 | 0 |

**Supplementary Material 4**


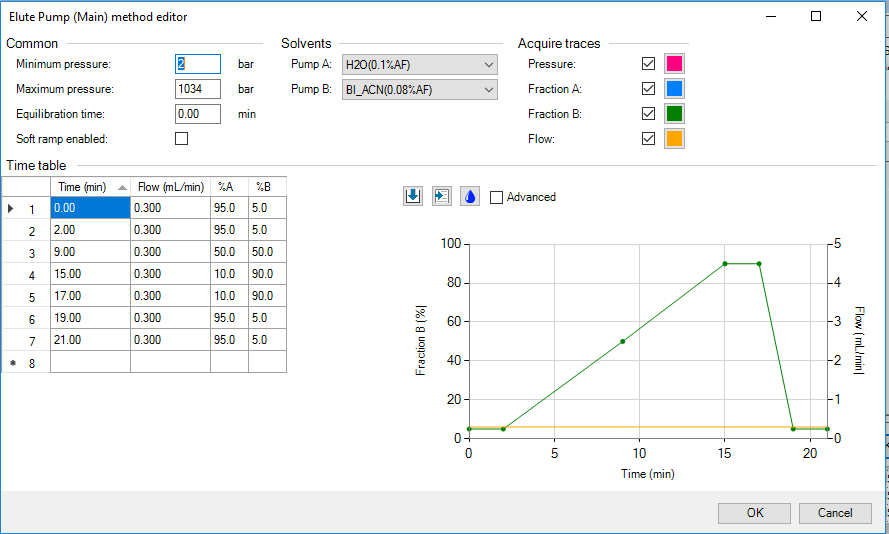
Elution gradient of Solvent B (CH3CN + 0.1% HCOOH) of the mobile phase used in the analysis of secondary metabolites by UHPLC-Q-TOF in 21 min.

**Supplementary Material 5**

Zoom (Tr = 0 to 18 mins) of the chromatograms of secondary metabolites obtained by UHPLC-Q-TOF analysis for QC shoots extracts (red) and QC root extracts (purple); QC: quality control containing 5µL of all extracts per compartment; C18 column; mobile phase: H₂O + 0.4% HCOOH (Solvent A) and CH₃CN + 0.1% HCOOH (Solvent B) black square: metabolic diversity observed at the end of the chromatogram.


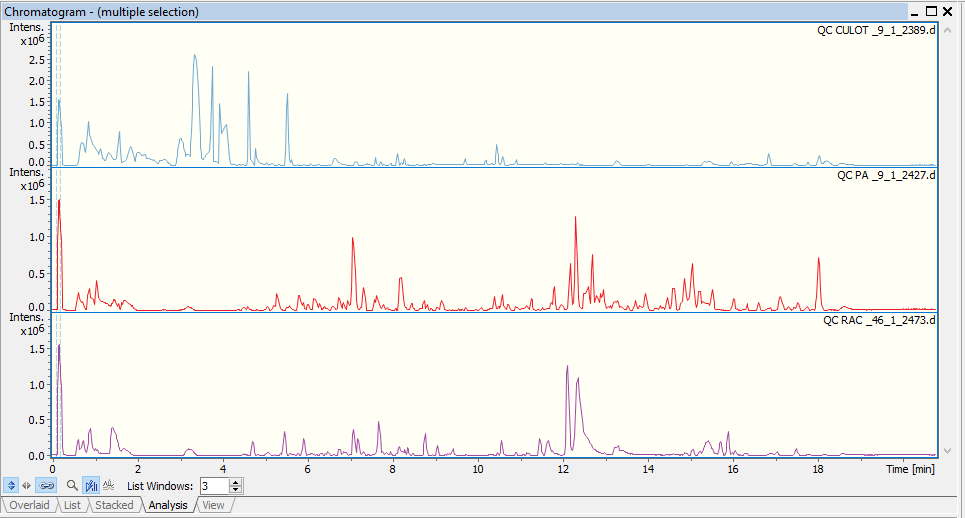


Supplementary Figure 3 : Zoom (Tr = 0 à 18 mins) des chromatogrammes des métabolites secondaires obtenus par analyse UHPLC-Q-TOF pour les extraits de QC culot ; QC : contrôle qualité contenant 5µL de tous les extraits par compartiment ; Colonne C18 ; phase mobile : H2O + 0.4% d’HCOOH (Solvant A) et CH3CN + 0.1% d’HCOOH (Solvant B), Flèche rouge : diversité métabolique observée en début de chromatogramme.

**Supplementary Material 6**

Zoom (Tr = 0 to 18 mins) of the chromatograms of secondary metabolites obtained by UHPLC-Q-TOF analysis for QC Frankia extracts; QC: quality control containing 5µL of all extracts per compartment; C18 column; mobile phase: H₂O + 0.4% HCOOH (Solvent A) and CH₃CN + 0.1% HCOOH (Solvent B), Red arrow: metabolic diversity observed at the start of the chromatogram.


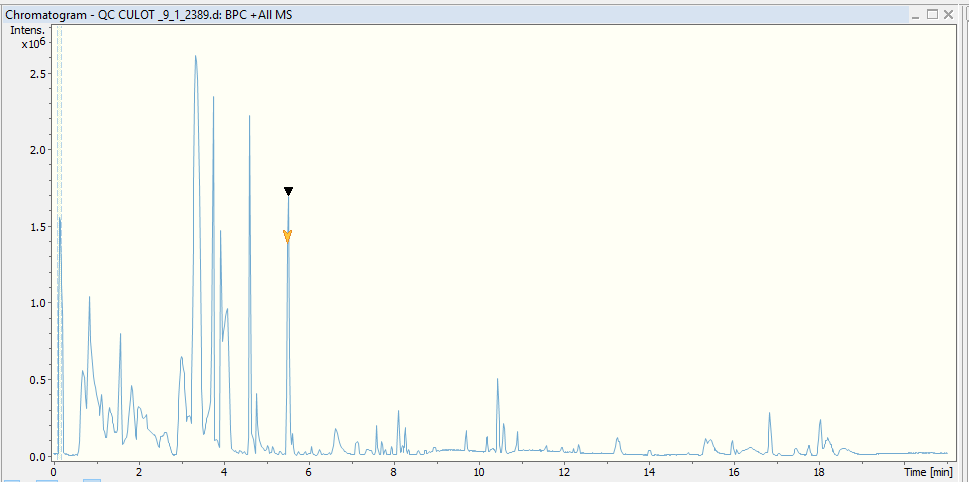

Supplement: Supplementary file 1 [file 71242702747434b4cd9482b6.docx]
